# Supplementary material for: The appropriateness of ceftriaxone and metronidazole as empirical therapy in managing complicated intra-abdominal infection—experience from Western Health, Australia
Source: PeerJ. 2018 Aug 15;6:e5383. doi: 10.7717/peerj.5383 (PMC6098677; doi:10.7717/peerj.5383)
Supplement: Data S1 [file peerj-06-5383-s001.xlsx]

## Sheet: Data for Analysis
Patient ID	Source/Location of Collection	Cause	Micro1	Sens1	Micro2	Sens2	Micro3	Sens3	Admission Date Time	Separation Date Time	Episode Number	Count	Age	Total LOS Days	Principal Diagnosis Code	Principal Diagnosis	Diagnosis Code	Diagnosis	Discharge Specialty Code	Discharge Specialty
5	Sigmoid Colon	Perforation - foreign object	No growth						2017-06-19 23:15:00	2017-06-28 10:00:00	4465728	1	47	8.45	K631	Perforation of intestine (nontraumatic)	K631	K631: Perforation of intestine (nontraumatic)	CRGS	Colorectal & Gen Surgery Unit
12	Sigmoid Colon	Diverticulitis	Mixed enterococci		Skin flora				2017-06-15 13:50:00	2017-06-27 12:39:00	4463247	2	56	11.95	K5722	Diverlitis lrg intest w perf abs wo haem	K560	K560: Paralytic ileus	GBS	General and Breast Surgery
16	Descending Colon	Diverticulitis	E.coli (ESBL)	Meropenem, cipro, cotrimox					2017-06-10 20:45:00	2017-06-26 17:12:00	4461328	1	69	15.85	K5722	Diverlitis lrg intest w perf abs wo haem	K5722	K5722: Diverlitis lrg intest w perf abs wo haem	GBS	General and Breast Surgery
18	Appendix	Appendicitis	Mixed coliforms		Skin flora				2017-06-08 21:40:00	2017-06-16 13:16:00	4460355	1	75	7.65	K353	Ac appendicitis w localised peritonitis	K353	K353: Ac appendicitis w localised peritonitis	UGIG	Upper Gi & Gen Surgical Unit
25	Gallbladder	Cholecystitis	No growth						2017-06-04 09:30:00	2017-06-10 13:21:00	4457683	2	65	6.16	K8000	Calculus gallb w ac cholecystitis wo obs	K822	K822: Perforation of gallbladder	GES	General and Endocrine Surgery
47	Sigmoid Colon	Re-collection	E.coli (ESBL)	Meropenem, cipro, cotrimox					2017-05-10 12:31:00	2017-06-01 18:06:00	4444724	1	67	22.23	K5722	Diverlitis lrg intest w perf abs wo haem	K5722	K5722: Diverlitis lrg intest w perf abs wo haem	CRGS	Colorectal & Gen Surgery Unit
58	Gallbladder	Cholecystitis	Streptococcus anginosus	Penicillin, Erythromycin, Clindamycin					2017-04-19 14:09:00	2017-05-03 16:30:00	4433527	1	59	14.1	K8000	Calculus gallb w ac cholecystitis wo obs	K822	K822: Perforation of gallbladder	UGIG	Upper Gi & Gen Surgical Unit
60	Appendix	Appendicitis	Mixed coliforms		Skin flora				2017-04-17 17:10:00	2017-04-23 09:20:00	4432416	1	53	5.67	K353	Ac appendicitis w localised peritonitis	K353	K353: Ac appendicitis w localised peritonitis	GBS	General and Breast Surgery
69	Appendix	Appendicitis	Mixed anaerobes	Metronidazole					2017-03-31 23:40:00	2017-04-24 10:00:00	4424134	1	75	23.43	A414	Sepsis due to anaerobes	K353	K353: Ac appendicitis w localised peritonitis	UGIG	Upper Gi & Gen Surgical Unit
72	Biliary	Pancreatic mass	Enterococcus faecalis	Amox, Vanc	Enterobacter cloacae	cipro, gent, cotrimoxazole	Mixed anaerobes	Metronidazole	2017-03-29 19:30:00	2017-04-16 10:00:00	4422837	1	66	17.6	C250	Malignant neoplasm of head of pancreas	K918	K918: Oth postproc disrd digestive system NEC	UGIG	Upper Gi & Gen Surgical Unit
76a	Rectosigmoid	Perforation - foreign object	Klebsiella pneumoniae	Ceftriaxone	Enterococcus faecalis	Amox, Vanc			2017-03-26 13:40:00	2017-05-17 16:00:00	4420718	1	40	52.1	K659	Peritonitis unspecified	K631	K631: Perforation of intestine (nontraumatic)	UGIG	Upper Gi & Gen Surgical Unit
76b	Rectosigmoid	Re-collection	Mixed enterococci		Mixed coliforms
83	Appendix	Appendicitis	No growth						2017-03-23 01:30:00	2017-04-05 10:39:00	4418880	1	32	13.38	K353	Ac appendicitis w localised peritonitis	K353	K353: Ac appendicitis w localised peritonitis	UGIG	Upper Gi & Gen Surgical Unit
85	Terminal ileum	Perforation	Clostridium bacillus	Aug DF, penicillin, metronidazole etc					2017-03-22 18:56:00	2017-03-29 09:52:00	4418748	1	49	6.62	K631	Perforation of intestine (nontraumatic)	K631	K631: Perforation of intestine (nontraumatic)	UGIG	Upper Gi & Gen Surgical Unit
87	Gallbladder	Cholecystitis	E.coli	Ceftriaxone					2017-03-20 19:55:00	2017-04-30 07:50:00	4417537	1	68	40.5	K810	Acute cholecystitis	K822	K822: Perforation of gallbladder	GBS	General and Breast Surgery
	Gallbladder	Re-collection	No growth
88	Perihepatic	Postop collection	Enterobacter cloacae	cipro, gent, cotrimoxazole	Candida albicans	Fluconazole			2017-03-20 16:51:00	2017-05-06 14:09:00	4417354	1	58	46.89	K918	Oth postproc disrd digestive system NEC	K918	K918: Oth postproc disrd digestive system NEC	UGIG	Upper Gi & Gen Surgical Unit
93a	Sigmoid Colon	Diverticulitis	E.coli	Ceftriaxone	Mixed anaerobes	Metronidazole			2017-03-14 07:03:00	2017-03-19 13:36:00	4414076	1	38	5.27	K5722	Diverlitis lrg intest w perf abs wo haem	K5722	K5722: Diverlitis lrg intest w perf abs wo haem	CRGS	Colorectal & Gen Surgery Unit
93b	Abdomen	Fistula	Pseudomonas aeruginosa	Ciprofloxacin (R to Ceft)	E.coli	Ceftriaxone
100	Perihepatic	Postop collection	No growth						2017-03-05 19:35:00	2017-03-16 12:47:00	4410723	1	71	10.72	K918	Oth postproc disrd digestive system NEC	K918	K918: Oth postproc disrd digestive system NEC	GBS	General and Breast Surgery
111	Sigmoid Colon	Diverticulitis	E.coli (ESBL)	Meropenem, cipro, cotrimox					2017-02-26 02:49:00	2017-03-21 17:44:00	4407349	1	35	23.62	K5722	Diverlitis lrg intest w perf abs wo haem	K5722	K5722: Diverlitis lrg intest w perf abs wo haem	UGIG	Upper Gi & Gen Surgical Unit
115	Hepatic Flexure (Colon)	Perforation - CRC	Enterococcus faecalis	Amox, Vanc					2017-02-22 15:30:00	2017-03-15 10:40:00	4405851	1	85	20.8	K631	Perforation of intestine (nontraumatic)	K631	K631: Perforation of intestine (nontraumatic)	GES	General and Endocrine Surgery
129a	Transverse Colon	Perforation - volvulus	Candida tropicalis	Fluconazole, amphotericin B					2017-02-05 18:38:00	2017-02-16 18:50:00	4398534	2	56	11.01	K559	Vascular disorder of intestine unsp	K631	K631: Perforation of intestine (nontraumatic)	UGIG	Upper Gi & Gen Surgical Unit
129b	Transverse Colon	Re-collection	Candida tropicalis	Fluconazole, amphotericin B
143a	Transverse Colon	Postop perforation	E.coli	Ceftriaxone	Mixed anaerobes	Metronidazole			2017-01-27 07:03:00	2017-02-27 22:00:00	4394688	1	60	31.62	D3771	Neoplm uncertain or unknown beh pancreas	K631	K631: Perforation of intestine (nontraumatic)	UGIG	Upper Gi & Gen Surgical Unit
143b	Transverse Colon	Re-collection	E.coli	Ceftriaxone	Mixed anaerobes	Metronidazole
159	Sigmoid Colon	Diverticulitis	Mixed anaerobes	Metronidazole	Skin flora				2017-01-13 16:04:00	2017-01-25 14:30:00	4389314	1	70	11.93	K5722	Diverlitis lrg intest w perf abs wo haem	K5722	K5722: Diverlitis lrg intest w perf abs wo haem	CRGS	Colorectal & Gen Surgery Unit
164	Sigmoid Colon	Perforation - diverticula stricture	No growth						2017-01-10 00:50:00	2017-01-16 14:13:00	4387282	1	65	6.56	K5723	Diverlitis lrg intest w haem perf & abs	K918	K918: Oth postproc disrd digestive system NEC	CRGS	Colorectal & Gen Surgery Unit
165a	Duodenum	Postop perforation	E.coli (ESBL)	Meropenem, cipro, cotrimox	Enterococcus faecalis	Amox, Vanc			2017-01-06 23:45:00	2017-02-07 14:02:00	4386212	1	84	31.6	K631	Perforation of intestine (nontraumatic)	K631	K631: Perforation of intestine (nontraumatic)	UGIG	Upper Gi & Gen Surgical Unit
165b	Duodenum	Re-collection	Candida tropicalis	Fluconazole, amphotericin B
168	Proximal Colon	Anastomotic leak	Mixed enteric flora						2017-01-03 07:00:00	2017-02-11 14:00:00	4384548	1	73	39.29	C183	Malignant neoplasm of hepatic flexure	K631	K631: Perforation of intestine (nontraumatic)	CRGS	Colorectal & Gen Surgery Unit
171	Sigmoid Colon	Perforation	Streptococcus anginosus	Penicillin, Erythromycin, Clindamycin					2017-01-02 11:40:00	2017-01-09 15:50:00	4384302	1	64	7.17	K631	Perforation of intestine (nontraumatic)	K631	K631: Perforation of intestine (nontraumatic)	GBS	General and Breast Surgery
172	Small Bowel	Postop collection	Klebsiella oxytoca	Ceftriaxone	Enterococcus faecalis	Amox, Vanc			2016-12-31 23:20:00	2017-01-05 13:04:00	4383966	1	78	4.57	K918	Oth postproc disrd digestive system NEC	K918	K918: Oth postproc disrd digestive system NEC	GBS	General and Breast Surgery
178	Sigmoid Colon	Diverticulitis	E.coli (ESBL)	Meropenem, cipro, cotrimox					2016-12-22 12:46:00	2017-01-11 14:00:00	4380570	1	69	20.05	K5722	Diverlitis lrg intest w perf abs wo haem	K5722	K5722: Diverlitis lrg intest w perf abs wo haem	GBS	General and Breast Surgery
208	Appendix	Appendicitis	Streptococcus constellatus	Penicillin	Bacteroides spp	Metronidazole			2016-11-25 23:41:00	2016-11-29 10:50:00	4369194	1	67	3.46	K353	Ac appendicitis w localised peritonitis	K353	K353: Ac appendicitis w localised peritonitis	CRGS	Colorectal & Gen Surgery Unit
213	Appendix	Appendicitis	Eikenella corrodens	Amox, Cipro	Mixed anaerobes	Metronidazole			2016-11-20 18:48:00	2016-11-23 10:46:00	4366467	1	70	2.67	K353	Ac appendicitis w localised peritonitis	K353	K353: Ac appendicitis w localised peritonitis	GBS	General and Breast Surgery
234	Proximal Colon	Postop collection	Mixed coliforms						2016-11-03 11:41:00	2016-11-23 12:07:00	4359459	1	75	20.02	C183	Malignant neoplasm of hepatic flexure	K918	K918: Oth postproc disrd digestive system NEC	CRGS	Colorectal & Gen Surgery Unit
239	Gallbladder	Cholecystitis	E.coli	Ceftriaxone					2016-10-29 14:04:00	2016-11-02 11:47:00	4357551	1	64	3.9	K8000	Calculus gallb w ac cholecystitis wo obs	K822	K822: Perforation of gallbladder	GBS	General and Breast Surgery
244	Small Bowel	Postop perforation	No growth						2016-10-23 18:48:00	2016-12-08 14:00:00	4354976	1	40	45.8	K631	Perforation of intestine (nontraumatic)	K631	K631: Perforation of intestine (nontraumatic)	CRGS	Colorectal & Gen Surgery Unit
269	Sigmoid Colon	Diverticulitis	Enterococcus faecium	Vanc (R to amox)					2016-09-29 20:55:00	2016-10-13 12:30:00	4345341	1	69	13.65	K5722	Diverlitis lrg intest w perf abs wo haem	K5722	K5722: Diverlitis lrg intest w perf abs wo haem	CRGS	Colorectal & Gen Surgery Unit
292	Appendix	Re-collection	Mixed coliforms		Skin flora				2016-09-02 20:31:00	2016-09-06 10:17:00	4333801	1	57	3.57	K353	Ac appendicitis w localised peritonitis	K353	K353: Ac appendicitis w localised peritonitis	GBS	General and Breast Surgery
296	Gallbladder	Postop bile leak	Mixed coliforms						2016-08-31 07:51:00	2016-09-30 10:38:00	4332464	1	85	30.12	K8000	Calculus gallb w ac cholecystitis wo obs	K918	K918: Oth postproc disrd digestive system NEC	UGIG	Upper Gi & Gen Surgical Unit
299	Transverse Colon	Perforation - ischaemia	No growth						2016-08-26 18:15:00	2016-09-27 15:57:00	4330778	1	74	31.9	K631	Perforation of intestine (nontraumatic)	K631	K631: Perforation of intestine (nontraumatic)	GES	General and Endocrine Surgery
301	Sigmoid Colon	Diverticulitis	No growth						2016-08-20 22:07:00	2016-11-08 11:33:00	4328302	1	65	79.56	K5722	Diverlitis lrg intest w perf abs wo haem	K5722	K5722: Diverlitis lrg intest w perf abs wo haem	GBS	General and Breast Surgery
304	Perihepatic	Amoebic hepatic infection	No growth						2016-08-17 10:15:00	2016-09-22 13:00:00	4326583	1	62	36.11	A064	Amoebic liver abscess	K918	K918: Oth postproc disrd digestive system NEC	UGIG	Upper Gi & Gen Surgical Unit
310	Hepatic Flexure (Colon)	Perforation - ischaemia	No growth						2016-08-14 02:45:00	2016-09-01 15:12:00	4325496	1	62	18.52	A419	Sepsis, unspecified	K631	K631: Perforation of intestine (nontraumatic)	GBS	General and Breast Surgery
320	Appendix	Re-collection	Mixed enteric flora						2016-07-24 00:22:00	2016-07-28 11:35:00	4316822	1	39	4.47	K353	Ac appendicitis w localised peritonitis	K353	K353: Ac appendicitis w localised peritonitis	GES	General and Endocrine Surgery
323	Appendix	Re-collection	Mixed anaerobes	Metronidazole	Mixed enteric flora				2016-07-16 21:00:00	2016-07-19 13:15:00	4313763	1	60	2.68	K353	Ac appendicitis w localised peritonitis	K353	K353: Ac appendicitis w localised peritonitis	UGIG	Upper Gi & Gen Surgical Unit
344	Stomach	Perforation - ulcer	Pseudomonas aeruginosa	Ciprofloxacin (R to Ceft)	Candida albicans	Fluconazole			2016-06-25 20:18:00	2016-07-12 12:08:00	4305084	1	38	16.66	I501	Left ventricular failure	K918	K918: Oth postproc disrd digestive system NEC	UGIG	Upper Gi & Gen Surgical Unit
359	Appendix	Appendicitis	No growth						2016-06-14 19:07:00	2016-07-08 18:24:00	4300144	1	14	23.97	K353	Ac appendicitis w localised peritonitis	K353	K353: Ac appendicitis w localised peritonitis	GBS	General and Breast Surgery
362	Appendix	Appendicitis	No growth						2016-06-13 08:10:00	2016-06-15 10:00:00	4299499	1	36	2.08	K353	Ac appendicitis w localised peritonitis	K353	K353: Ac appendicitis w localised peritonitis	GES	General and Endocrine Surgery
372	Appendix	Re-collection	Pseudomonas aeruginosa	Ciprofloxacin (R to Ceft)					2016-05-26 10:15:00	2016-06-12 16:00:00	4291898	1	20	17.24	T814	Wound infection following a proc NEC	K631	K631: Perforation of intestine (nontraumatic)	GBS	General and Breast Surgery
380	Sigmoid Colon	Colovesical fistula	Candida albicans	Fluconazole	Mixed coliforms				2016-05-16 15:59:00	2016-06-08 23:20:00	4287825	1	83	23.31	K5722	Diverlitis lrg intest w perf abs wo haem	K5722	K5722: Diverlitis lrg intest w perf abs wo haem	CRGS	Colorectal & Gen Surgery Unit
383	Sigmoid Colon	Diverticulitis	E.coli	Ceftriaxone					2016-05-10 12:19:00	2016-05-23 12:15:00	4285196	1	61	13	K5722	Diverlitis lrg intest w perf abs wo haem	K5722	K5722: Diverlitis lrg intest w perf abs wo haem	CRGS	Colorectal & Gen Surgery Unit
387	Small Bowel	Perforation	MSSA	Cephalexin	Mixed enteric flora				2016-05-04 16:50:00	2016-05-17 11:03:00	4282718	1	29	12.76	K631	Perforation of intestine (nontraumatic)	K631	K631: Perforation of intestine (nontraumatic)	GBS	General and Breast Surgery
389	Rectosigmoid	Postop collection	E.coli (ESBL)	Meropenem, cipro, cotrimox					2016-05-03 19:00:00	2016-05-10 12:52:00	4282330	1	45	6.74	K918	Oth postproc disrd digestive system NEC	K918	K918: Oth postproc disrd digestive system NEC	GBS	General and Breast Surgery
393	Appendix	Appendicitis	No growth						2016-04-27 21:10:00	2016-05-01 16:37:00	4279954	1	38	3.81	K353	Ac appendicitis w localised peritonitis	K353	K353: Ac appendicitis w localised peritonitis	GBS	General and Breast Surgery
395	Appendix	Appendicitis	Pseudomonas aeruginosa	Ciprofloxacin (R to Ceft)					2016-04-27 10:59:00	2016-04-28 13:03:00	4279607	1	36	1.09	K353	Ac appendicitis w localised peritonitis	K353	K353: Ac appendicitis w localised peritonitis	CRGS	Colorectal & Gen Surgery Unit
398	Appendix	Appendicitis	Streptococcus anginosus	Penicillin, Erythromycin, Clindamycin	Mixed coliforms				2016-04-19 13:10:00	2016-04-22 13:05:00	4276532	1	34	3	K353	Ac appendicitis w localised peritonitis	K353	K353: Ac appendicitis w localised peritonitis	CRGS	Colorectal & Gen Surgery Unit
400	Appendix	Appendicitis	VRE						2016-04-16 08:00:00	2016-05-11 12:47:00	4275513	2	56	25.2	A412	Sepsis due to unsp staphylococcus	K353	K353: Ac appendicitis w localised peritonitis	GBS	General and Breast Surgery
401	Gallbladder	Cholecystitis	Mixed enteric flora						2016-04-15 17:49:00	2016-04-29 12:30:00	4275400	1	63	13.78	K810	Acute cholecystitis	K822	K822: Perforation of gallbladder	UGIG	Upper Gi & Gen Surgical Unit
404	Sigmoid Colon	Diverticulitis	Klebsiella pneumoniae	Ceft					2016-04-13 04:53:00	2016-04-18 11:41:00	4274057	1	46	5.28	K5722	Diverlitis lrg intest w perf abs wo haem	K5722	K5722: Diverlitis lrg intest w perf abs wo haem	CRGS	Colorectal & Gen Surgery Unit
406	Appendix	Appendicitis	E.coli (ESBL)	Meropenem, cipro, cotrimox					2016-04-09 20:10:00	2016-04-12 12:10:00	4272838	1	68	2.67	K353	Ac appendicitis w localised peritonitis	K353	K353: Ac appendicitis w localised peritonitis	GBS	General and Breast Surgery
408	Appendix	Appendicitis	No growth						2016-04-08 18:55:00	2016-04-13 14:45:00	4272561	1	80	4.83	K353	Ac appendicitis w localised peritonitis	K353	K353: Ac appendicitis w localised peritonitis	GES	General and Endocrine Surgery
409	Pancreas	Pancreatitis	Pseudomonas aeruginosa	Ciprofloxacin (R to Ceft)	Enterobacter aerogenes	Ciprofloxacin (R to Ceft)			2016-04-07 18:04:00	2016-08-17 12:30:00	4272070	1	48	131.77	K861	Other chronic pancreatitis	K631	K631: Perforation of intestine (nontraumatic)	UGIG	Upper Gi & Gen Surgical Unit
418	Pancreas	Ruptured splenic artery aneurysm	Mixed enteric flora						2016-03-31 16:37:00	2016-05-06 10:00:00	4269065	1	29	35.72	I728	Aneurysm & dissect oth spec arteries	K918	K918: Oth postproc disrd digestive system NEC	UGIG	Upper Gi & Gen Surgical Unit
421	Sigmoid Colon	Diverticulitis	Enterococcus faecalis	Amox/Vanc (R to Ceft)					2016-03-24 16:40:00	2016-04-02 13:00:00	4266562	1	64	8.85	K5722	Diverlitis lrg intest w perf abs wo haem	K5722	K5722: Diverlitis lrg intest w perf abs wo haem	CRGS	Colorectal & Gen Surgery Unit
429	Sigmoid Colon	Diverticulitis	Enterobacter cloacae	R to Ceft	Enterococcus faecalis	Amox/Vanc (R to Ceft)	Candida krusei		2016-03-20 17:50:00	2016-05-28 17:11:00	4264545	1	72	68.97	K5722	Diverlitis lrg intest w perf abs wo haem	K5722	K5722: Diverlitis lrg intest w perf abs wo haem	GBS	General and Breast Surgery
431	Sigmoid Colon	Diverticulitis	Enterococcus faecalis	Amox/Vanc (R to Ceft)					2016-03-19 06:00:00	2016-03-24 16:14:00	4264126	1	64	5.43	K5722	Diverlitis lrg intest w perf abs wo haem	K5722	K5722: Diverlitis lrg intest w perf abs wo haem	UGIG	Upper Gi & Gen Surgical Unit
432	Terminal ileum	Perforation - Crohn's	Candida dubliniensis						2016-03-18 13:07:00	2016-03-27 12:16:00	4264001	1	48	8.96	K501	Crohns disease of large intestine	K631	K631: Perforation of intestine (nontraumatic)	CRGS	Colorectal & Gen Surgery Unit
434	Appendix	Appendicitis	Streptococcus constellatus	Penicillin					2016-03-17 20:30:00	2016-03-24 11:10:00	4263559	1	16	6.61	K353	Ac appendicitis w localised peritonitis	K353	K353: Ac appendicitis w localised peritonitis	GBS	General and Breast Surgery
436	Appendix	Appendicitis	Mixed anaerobes		Mixed coliforms				2016-03-15 17:51:00	2016-03-19 09:30:00	4262629	1	46	3.65	K353	Ac appendicitis w localised peritonitis	K353	K353: Ac appendicitis w localised peritonitis	CRGS	Colorectal & Gen Surgery Unit
438	Sigmoid Colon	Diverticulitis	No growth						2016-03-14 08:09:00	2016-03-17 10:51:00	4261964	1	50	3.11	K5722	Diverlitis lrg intest w perf abs wo haem	K5722	K5722: Diverlitis lrg intest w perf abs wo haem	UGIG	Upper Gi & Gen Surgical Unit
448	Appendix	Appendicitis	E.coli	Ceftriaxone					2016-03-07 07:00:00	2016-03-14 14:08:00	4259071	1	48	7.3	K353	Ac appendicitis w localised peritonitis	K353	K353: Ac appendicitis w localised peritonitis	CRGS	Colorectal & Gen Surgery Unit
460	Sigmoid Colon	Diverticulitis	Mixed coliforms						2016-02-24 17:32:00	2016-03-03 14:02:00	4254416	1	59	7.85	K5722	Diverlitis lrg intest w perf abs wo haem	K5722	K5722: Diverlitis lrg intest w perf abs wo haem	GBS	General and Breast Surgery
494	Small Bowel	SBO	No growth						2016-01-13 08:55:00	2016-01-17 17:07:00	4237866	1	35	4.34	K566	Oth & unsp intestinal obstruction	K918	K918: Oth postproc disrd digestive system NEC	UGIG	Upper Gi & Gen Surgical Unit
495	Duodenum	Perforation - ulcer	E.coli	Ceftriaxone					2016-01-10 03:10:00	2016-01-24 16:00:00	4236738	1	83	14.53	K265	Chronic or unsp duodenal ulcer w perf	K918	K918: Oth postproc disrd digestive system NEC	GBS	General and Breast Surgery
496	Hepatic Flexure (Colon)	Perforation - CRC	Klebsiella pneumoniae	Ceft					2016-01-10 00:40:00	2016-01-15 13:52:00	4236747	1	56	5.55	C184	Malignant neoplasm of transverse colon	K631	K631: Perforation of intestine (nontraumatic)	UGIG	Upper Gi & Gen Surgical Unit
497a	Appendix	Appendicitis	Mixed coliforms		Mixed enterococci				2016-01-09 07:56:00	2016-01-20 12:25:00	4236525	1	43	11.19	K353	Ac appendicitis w localised peritonitis	K353	K353: Ac appendicitis w localised peritonitis	GES	General and Endocrine Surgery
497b	Appendix	Re-collection	E.coli (ESBL)	Meropenem, cipro, cotrimox
499a	Pancreas	Pancreatitis	Klebsiella pneumoniae		Candida glabrata		Lactobacillus		2016-01-07 16:12:00	2016-06-26 16:38:00	4244953	1	61	171.02	K851	Biliary acute pancreatitis	K918	K918: Oth postproc disrd digestive system NEC	UGIG	Upper Gi & Gen Surgical Unit
499b	Pancreas	Re-collection	VRE	Teicoplanin	Pseudomonas aeruginosa	Ciprofloxacin (R to Ceft)
499c	Pancreas	Re-collection	Enterococcus faecium	Vanc (R to amox)
504	Appendix	Appendicitis	Streptococcus constellatus	Penicillin	E.coli (ESBL)	Meropenem, cipro, cotrimox	Mixed anaerobes		2015-12-31 15:05:00	2016-01-21 15:00:00	4233428	1	56	21	K353	Ac appendicitis w localised peritonitis	K353	K353: Ac appendicitis w localised peritonitis	UGIG	Upper Gi & Gen Surgical Unit
518	Appendix	Re-collection	Streptococcus anginosus	Penicillin	Mixed anaerobes				2015-12-23 11:19:00	2015-12-26 15:00:00	4230609	1	52	3.15	K353	Ac appendicitis w localised peritonitis	K353	K353: Ac appendicitis w localised peritonitis	UGIG	Upper Gi & Gen Surgical Unit
520	Appendix	Appendicitis	Mixed anaerobes		Mixed coliforms				2015-12-21 16:00:00	2016-01-04 11:00:00	4230030	1	43	13.79	K353	Ac appendicitis w localised peritonitis	K353	K353: Ac appendicitis w localised peritonitis	GES	General and Endocrine Surgery
525	Stomach	Postop collection	VRE	Teicoplanin					2015-12-16 01:45:00	2016-01-29 10:00:00	4227802	1	71	44.34	C166	Malg neoplasm greater curve stomach unsp	K918	K918: Oth postproc disrd digestive system NEC	UGIG	Upper Gi & Gen Surgical Unit
529	Sigmoid Colon	Diverticulitis	Mixed coliforms						2015-12-13 21:30:00	2015-12-22 14:15:00	4226824	1	77	8.7	K5722	Diverlitis lrg intest w perf abs wo haem	K5722	K5722: Diverlitis lrg intest w perf abs wo haem	CRGS	Colorectal & Gen Surgery Unit
560	Proximal Colon	Postop collection	Mixed anaerobes		Mixed enterococci				2015-11-17 12:00:00	2016-01-21 12:30:00	4216098	1	51	65.02	C184	Malignant neoplasm of transverse colon	K918	K918: Oth postproc disrd digestive system NEC	CRGS	Colorectal & Gen Surgery Unit
567	Appendix	Appendicitis	No growth						2015-11-09 14:20:00	2015-11-12 09:52:00	4212457	1	21	2.81	K353	Ac appendicitis w localised peritonitis	K353	K353: Ac appendicitis w localised peritonitis	GBS	General and Breast Surgery
603	Pancreas	Pancreatitis	No growth						2015-10-13 14:45:00	2015-11-12 10:00:00	4201350	1	37	29.8	K852	Alcohol-induced acute pancreatitis	K560	K560: Paralytic ileus	UGIG	Upper Gi & Gen Surgical Unit
606	Rectosigmoid	Perforation - intercourse	E.coli (ESBL)	Meropenem, cipro, cotrimox	Streptococci	Ceftriaxone			2015-10-11 16:57:00	2015-10-23 13:55:00	4200721	1	31	11.87	K631	Perforation of intestine (nontraumatic)	K631	K631: Perforation of intestine (nontraumatic)	GBS	General and Breast Surgery
608	Sigmoid Colon	Diverticulitis	No growth						2015-10-07 15:32:00	2015-10-15 15:10:00	4199200	1	58	7.98	K5722	Diverlitis lrg intest w perf abs wo haem	K5722	K5722: Diverlitis lrg intest w perf abs wo haem	GBS	General and Breast Surgery
610	Perihepatic	Infarction	Citrobacter koseri	Ceftriaxone	VRE	Teicoplanin			2015-10-06 15:32:00	2015-11-16 10:00:00	4198759	1	75	40.77	I713	Abdominal aortic aneurysm ruptured	K918	K918: Oth postproc disrd digestive system NEC	UGIG	Upper Gi & Gen Surgical Unit
617	Appendix	Appendicitis	Streptococcus anginosus	Penicillin	Mixed anaerobes		Mixed coliforms		2015-10-03 12:40:00	2015-10-09 13:30:00	4197413	1	27	6.03	K353	Ac appendicitis w localised peritonitis	K353	K353: Ac appendicitis w localised peritonitis	GBS	General and Breast Surgery
621	Appendix	Appendicitis	E.coli	Ceftriaxone	Actinomyces spp				2015-09-30 00:15:00	2015-10-03 11:00:00	4196063	1	23	3.45	K353	Ac appendicitis w localised peritonitis	K353	K353: Ac appendicitis w localised peritonitis	CRGS	Colorectal & Gen Surgery Unit
632	Small Bowel	Perforation - obstruction	Mixed coliforms						2015-09-21 18:40:00	2015-11-10 20:30:00	4192622	1	17	50.08	K353	Ac appendicitis w localised peritonitis	K353	K353: Ac appendicitis w localised peritonitis	GBS	General and Breast Surgery
634	Appendix	Appendicitis	Mixed coliforms						2015-09-19 14:45:00	2015-09-22 18:30:00	4191986	1	74	3.16	K353	Ac appendicitis w localised peritonitis	K353	K353: Ac appendicitis w localised peritonitis	GBS	General and Breast Surgery
639	Small Bowel	Perforation - obstruction	Mixed coliforms						2015-09-17 04:54:00	2015-09-28 15:55:00	4190854	1	43	11.46	K914	Colostomy and enterostomy malfunction	K631	K631: Perforation of intestine (nontraumatic)	GES	General and Endocrine Surgery
644	Sigmoid Colon	Diverticulitis	E.coli	Ceftriaxone	Mixed anaerobes				2015-09-14 20:05:00	2015-09-29 14:30:00	4189769	1	52	14.77	K5722	Diverlitis lrg intest w perf abs wo haem	K5722	K5722: Diverlitis lrg intest w perf abs wo haem	GBS	General and Breast Surgery
645	Pancreas	Pseudocyst	No growth						2015-09-14 14:00:00	2015-09-18 12:00:00	4189560	1	37	3.92	K631	Perforation of intestine (nontraumatic)	K631	K631: Perforation of intestine (nontraumatic)	CRGS	Colorectal & Gen Surgery Unit
647	Stomach	Eroded gastroplasty	No growth						2015-09-14 11:38:00	2015-09-30 10:50:00	4189517	1	74	15.97	T855	Mech comp GI prosth dev impl gft	K918	K918: Oth postproc disrd digestive system NEC	UGIG	Upper Gi & Gen Surgical Unit
660	Ileosigmoid	Anastomotic leak	Candida albicans		Mixed coliforms				2015-09-07 09:29:00	2015-10-06 14:30:00	4186631	1	50	29.21	C187	Malignant neoplasm of sigmoid colon	K918	K918: Oth postproc disrd digestive system NEC	CRGS	Colorectal & Gen Surgery Unit
685	Sigmoid Colon	Diverticulitis	Streptococcus anginosus	Penicillin	Mixed anaerobes				2015-08-18 07:00:00	2015-08-26 11:30:00	4178057	1	71	8.19	Z433	Attention to colostomy	K918	K918: Oth postproc disrd digestive system NEC	CRGS	Colorectal & Gen Surgery Unit
700	Sigmoid Colon	Diverticulitis	Mixed anaerobes		Mixed coliforms				2015-08-05 19:57:00	2015-08-18 16:30:00	4173494	1	80	12.86	K5722	Diverlitis lrg intest w perf abs wo haem	K5722	K5722: Diverlitis lrg intest w perf abs wo haem	CRGS	Colorectal & Gen Surgery Unit
719	Sigmoid Colon	Diverticulitis	Mixed anaerobes						2015-07-26 07:15:00	2015-08-08 14:51:00	4168565	1	67	13.32	K5722	Diverlitis lrg intest w perf abs wo haem	K5722	K5722: Diverlitis lrg intest w perf abs wo haem	UGIG	Upper Gi & Gen Surgical Unit
727	Stomach	Postop collection	Streptococcus anginosus	Penicillin					2015-07-20 07:15:00	2015-08-12 16:40:00	4165821	1	66	23.39	C169	Malignant neoplasm stomach unspecified	K918	K918: Oth postproc disrd digestive system NEC	UGIG	Upper Gi & Gen Surgical Unit
735	Appendix	Appendicitis	E.coli	Ceftriaxone	Enterococcus avium	Amox	Streptococcus anginosus	Penicillin	2015-07-14 23:55:00	2015-07-19 15:08:00	4163778	1	86	4.63	K353	Ac appendicitis w localised peritonitis	K353	K353: Ac appendicitis w localised peritonitis	CRGS	Colorectal & Gen Surgery Unit
737	Appendix	Appendicitis	Mixed coliforms						2015-07-11 07:55:00	2015-07-22 14:30:00	4162469	1	53	11.27	K353	Ac appendicitis w localised peritonitis	K353	K353: Ac appendicitis w localised peritonitis	GSU	Sunshine General Surgery Unit
742	Duodenum	Perforation - ulcer	No growth						2015-07-07 07:00:00	2015-07-08 11:00:00	4160673	1	70	1.17	K8010	Calc gallb w oth cholecystitis wo obs	K918	K918: Oth postproc disrd digestive system NEC	GSU	Sunshine General Surgery Unit
746	Sigmoid Colon	Anastomotic leak	No growth						2015-07-04 18:05:00	2015-07-31 13:50:00	4159905	1	83	26.82	T814	Wound infection following a proc NEC	K918	K918: Oth postproc disrd digestive system NEC	UGIG	Upper Gi & Gen Surgical Unit
749	Appendix	Appendicitis	Pseudomonas aeruginosa	Ciprofloxacin (R to Ceft)	Mixed anaerobes		Mixed coliforms		2015-07-01 17:51:00	2015-07-05 11:19:00	4158627	1	34	3.73	K353	Ac appendicitis w localised peritonitis	K353	K353: Ac appendicitis w localised peritonitis	GSU	Sunshine General Surgery Unit
751	Sigmoid Colon	Perforation - CRC	No growth						2015-06-29 11:58:00	2015-07-03 11:15:00	4157476	1	68	3.97	Z432	Attention to ileostomy	K918	K918: Oth postproc disrd digestive system NEC	CRGS	Colorectal & Gen Surgery Unit
757	Appendix	Appendicitis	MSSA	Cephalexin/fluclox					2015-06-24 18:00:00	2015-06-30 18:17:00	4155801	1	40	6.01	N709	Salpingitis and oophoritis unspecified	K353	K353: Ac appendicitis w localised peritonitis	GSU	Sunshine General Surgery Unit
758	Appendix	Appendicitis	E.coli	Ceftriaxone					2015-06-24 10:50:00	2015-07-01 09:04:00	4155507	1	18	6.93	K353	Ac appendicitis w localised peritonitis	K353	K353: Ac appendicitis w localised peritonitis	GSU	Sunshine General Surgery Unit
759	Gallbladder	Cholecystitis	Klebsiella pneumoniae	Ceft					2015-06-24 07:00:00	2015-06-27 13:39:00	4155440	1	84	3.28	K8000	Calculus gallb w ac cholecystitis wo obs	K822	K822: Perforation of gallbladder	UGIG	Upper Gi & Gen Surgical Unit
774	Appendix	Appendicitis	Pseudomonas aeruginosa	Ciprofloxacin (R to Ceft)					2015-06-10 16:45:00	2015-06-16 15:39:00	4149840	1	67	5.95	K353	Ac appendicitis w localised peritonitis	K353	K353: Ac appendicitis w localised peritonitis	GSU	Sunshine General Surgery Unit
780	Appendix	Appendicitis	No growth						2015-06-05 18:20:00	2015-06-14 12:49:00	4148138	1	47	8.77	D27	Benign neoplasm of ovary	K353	K353: Ac appendicitis w localised peritonitis	GSU	Sunshine General Surgery Unit
781	Biliary	Postop collection	VRE	Teicoplanin	E.coli	Ceftriaxone			2015-06-05 07:07:00	2015-11-24 07:34:00	4147772	1	62	172.02	C258	Overlapping malignant lesion of pancreas	K918	K918: Oth postproc disrd digestive system NEC	UGIG	Upper Gi & Gen Surgical Unit
782	Biliary	Whipple's	Klebsiella oxytoca	Ceft					2015-06-03 11:44:00	2015-06-19 12:26:00	4146577	1	47	16.03	K8011	Calc gallb w oth cholecystitis w obs	K918	K918: Oth postproc disrd digestive system NEC	UGIG	Upper Gi & Gen Surgical Unit
789	Sigmoid Colon	Diverticulitis	Mixed anaerobes						2015-05-30 23:00:00	2015-06-08 11:52:00	4145352	1	41	8.54	K5722	Diverlitis lrg intest w perf abs wo haem	K5722	K5722: Diverlitis lrg intest w perf abs wo haem	GBES	Breast Endocrine & Gen Surg
800	Sigmoid Colon	Diverticulitis	MSSA	Cephalexin/fluclox	E.coli	Ceftriaxone			2015-05-23 14:55:00	2015-06-05 17:10:00	4141908	1	60	13.09	K5722	Diverlitis lrg intest w perf abs wo haem	K5722	K5722: Diverlitis lrg intest w perf abs wo haem	UGIG	Upper Gi & Gen Surgical Unit
802	Appendix	Appendicitis	Streptococcus constellatus	Penicillin	Bacteroides fragilis	Metronidazole			2015-05-21 07:50:00	2015-06-10 13:00:00	4140871	1	57	20.22	N700	Acute salpingitis and oophoritis	K353	K353: Ac appendicitis w localised peritonitis	GSU	Sunshine General Surgery Unit
812	Small Bowel	Perforation - obstruction	Enterobacter cloacae						2015-05-14 20:45:00	2015-06-04 16:01:00	4138216	1	67	20.8	K565	Intestinal adhesions with obstruction	K918	K918: Oth postproc disrd digestive system NEC	GSU	Sunshine General Surgery Unit
826	Stomach	Postop collection	Enterococcus faecium	Vanc (R to amox)	Enterobacter aerogenes	Cipro (R to Ceft)	Saccharomyces cerevisiae		2015-05-01 15:45:00	2015-06-06 18:00:00	4132296	1	65	36.09	K256	Chr or unsp gastrc ulcer w haem & perf	K918	K918: Oth postproc disrd digestive system NEC	UGIG	Upper Gi & Gen Surgical Unit
827	Small Bowel	Perforation - radiation enteritis	No growth						2015-05-01 12:45:00	2015-05-14 13:50:00	4132412	1	30	13.05	K520	Gastroenteritis & colitis dt radiation	K631	K631: Perforation of intestine (nontraumatic)	GBES	Breast Endocrine & Gen Surg
839	Appendix	Appendicitis	No growth						2015-04-23 01:49:00	2015-04-24 14:29:00	4129009	1	11	1.53	K353	Ac appendicitis w localised peritonitis	K353	K353: Ac appendicitis w localised peritonitis	GSU	Sunshine General Surgery Unit
866	Sigmoid Colon	Perforation - trauma	Streptococcus anginosus	Penicillin	mixed anaerobes				2015-03-31 11:54:00	2015-04-04 14:32:00	4120188	1	33	4.11	Z433	Attention to colostomy	K918	K918: Oth postproc disrd digestive system NEC	CRGS	Colorectal & Gen Surgery Unit
878	Sigmoid Colon	Re-collection	No growth						2015-03-20 22:55:00	2015-04-08 10:21:00	4116365	1	54	18.48	K5722	Diverlitis lrg intest w perf abs wo haem	K5722	K5722: Diverlitis lrg intest w perf abs wo haem	GSU	Sunshine General Surgery Unit
881	Appendix	Re-collection	E.coli	Ceftriaxone					2015-03-20 01:39:00	2015-03-29 16:35:00	4115737	1	28	9.62	K353	Ac appendicitis w localised peritonitis	K353	K353: Ac appendicitis w localised peritonitis	GBES	Breast Endocrine & Gen Surg
902	Perihepatic	Postop collection	No growth						2015-02-24 07:00:00	2015-04-27 14:00:00	4106177	1	74	62.29	C182	Malignant neoplasm of ascending colon	K918	K918: Oth postproc disrd digestive system NEC	CRGS	Colorectal & Gen Surgery Unit
904	Sigmoid Colon	Perforation - CRC	Pseudomonas aeruginosa	Ciprofloxacin (R to Ceft)					2015-02-23 12:38:00	2015-03-10 10:45:00	4105772	2	90	14.92	K5722	Diverlitis lrg intest w perf abs wo haem	K631	K631: Perforation of intestine (nontraumatic)	GSU	Sunshine General Surgery Unit
913	Sigmoid Colon	Diverticulitis	Mixed anaerobes						2015-02-17 10:23:00	2015-03-04 13:00:00	4103467	1	78	15.11	K5722	Diverlitis lrg intest w perf abs wo haem	K5722	K5722: Diverlitis lrg intest w perf abs wo haem	CRGS	Colorectal & Gen Surgery Unit
915	Sigmoid Colon	Re-collection	Mixed anaerobes						2015-02-16 23:00:00	2015-03-13 11:50:00	4103482	1	83	24.53	K5722	Diverlitis lrg intest w perf abs wo haem	K5722	K5722: Diverlitis lrg intest w perf abs wo haem	GBES	Breast Endocrine & Gen Surg
919	Biliary	Postop collection	No growth						2015-02-13 09:37:00	2015-02-23 15:20:00	4102305	1	26	10.24	Q444	Choledochal cyst	K918	K918: Oth postproc disrd digestive system NEC	UGIG	Upper Gi & Gen Surgical Unit
925	Rectum	Perforation - procedure	E.coli (ESBL)	Meropenem, cipro, cotrimox	Mixed anaerobes		Mixed enterococci		2015-02-09 07:05:00	2015-03-25 15:00:00	4100385	1	42	44.33	C20	Malignant neoplasm of rectum	K918	K918: Oth postproc disrd digestive system NEC	CRGS	Colorectal & Gen Surgery Unit
937	Appendix	Appendicitis	E.coli	Ceftriaxone					2015-01-30 06:03:00	2015-02-05 13:16:00	4096991	1	18	6.3	K353	Ac appendicitis w localised peritonitis	K353	K353: Ac appendicitis w localised peritonitis	GSU	Sunshine General Surgery Unit
950	Rectosigmoid	Perforation - CRC	Enterococcus faecalis	Amox/Vanc (R to Ceft)	VRE	Teicoplanin	Mixed anaerobes		2015-01-16 10:35:00	2015-03-18 14:01:00	4091893	1	64	61.14	T835	Infectn inf dt prosth dev impl urin sys	K631	K631: Perforation of intestine (nontraumatic)	CRGS	Colorectal & Gen Surgery Unit
981	Appendix	Appendicitis	E.coli	Ceftriaxone					2014-12-19 14:20:00	2014-12-25 10:00:00	4082594	1	30	5.82	K353	Ac appendicitis w localised peritonitis	K353	K353: Ac appendicitis w localised peritonitis	GSU	Sunshine General Surgery Unit
987	Small Bowel	Hepatocolonic fistula	Pseudomonas aeruginosa	Ciprofloxacin (R to Ceft)	Mixed anaerobes				2014-12-13 02:00:00	2014-12-31 13:00:00	4080023	1	79	18.46	A4152	Sepsis due to Pseudomonas	K918	K918: Oth postproc disrd digestive system NEC	UGIG	Upper Gi & Gen Surgical Unit
988	Appendix	Re-collection	No growth						2014-12-11 17:57:00	2014-12-19 10:00:00	4079488	1	19	7.67	A419	Sepsis, unspecified	K353	K353: Ac appendicitis w localised peritonitis	GSU	Sunshine General Surgery Unit
1001	Appendix	Appendicitis	Citrobacter freundii	Cipro (R to Ceft)	Streptococcus anginosus	Penicillin			2014-12-02 15:24:00	2014-12-06 12:40:00	4075529	1	39	3.89	K353	Ac appendicitis w localised peritonitis	K353	K353: Ac appendicitis w localised peritonitis	GBES	Breast Endocrine & Gen Surg
1046	Psoas	Abscess	E.coli	Ceftriaxone					2014-10-24 14:01:00	2014-11-06 14:55:00	4060754	1	65	13.04	K818	Other cholecystitis	K822	K822: Perforation of gallbladder	GBES	Breast Endocrine & Gen Surg
1051a	Sigmoid Colon	Diverticulitis	Mixed enteric flora						2014-10-21 14:03:00	2014-11-03 15:38:00	4058896	1	67	13.07	K632	Fistula of intestine	K5722	K5722: Diverlitis lrg intest w perf abs wo haem	CRGS	Colorectal & Gen Surgery Unit
1051b	Sigmoid Colon	Re-collection	E.coli	Ceftriaxone	Enterococcus faecalis	Amox/Vanc (R to Ceft)
1059a	Duodenum	Postop collection	Mixed coliforms						2014-10-15 01:10:00	2014-10-20 17:10:00	4056377	1	52	5.67	K918	Oth postproc disrd digestive system NEC	K918	K918: Oth postproc disrd digestive system NEC	UGIG	Upper Gi & Gen Surgical Unit
1059b	Duodenum	Re-collection	No growth
1096	Gallbladder	Cholecystitis	No growth						2014-09-16 15:35:00	2014-10-02 10:00:00	4045343	1	71	15.77	A419	Sepsis, unspecified	K918	K918: Oth postproc disrd digestive system NEC	UGIG	Upper Gi & Gen Surgical Unit
1099	Sigmoid Colon	Re-collection	No growth						2014-09-15 18:50:00	2014-09-26 16:28:00	4044908	1	58	10.9	K5723	Diverlitis lrg intest w haem perf & abs	K918	K918: Oth postproc disrd digestive system NEC	CRGS	Colorectal & Gen Surgery Unit
1107	Sigmoid Colon	Diverticulitis	Mixed enteric flora						2014-09-11 13:40:00	2014-09-23 11:31:00	4043314	1	54	11.91	K5722	Diverlitis lrg intest w perf abs wo haem	K5722	K5722: Diverlitis lrg intest w perf abs wo haem	GSU	Sunshine General Surgery Unit
1146	Gallbladder	Postop bile leak	No growth						2014-08-08 02:34:00	2014-08-12 14:53:00	4029529	1	41	4.51	K918	Oth postproc disrd digestive system NEC	K918	K918: Oth postproc disrd digestive system NEC	GSU	Sunshine General Surgery Unit
1155	Distal colon	Re-collection	Enterococcus faecium	Vanc (R to amox)					2014-07-27 15:10:00	2014-08-18 14:42:00	4024952	1	67	21.98	T8141	Wound infection following a procedure	K918	K918: Oth postproc disrd digestive system NEC	CRGS	Colorectal & Gen Surgery Unit
1170	Sigmoid Colon	Perforation - CRC	E.coli	Ceftriaxone	Enterococcus faecalis	Amox/Vanc (R to Ceft)			2014-07-12 02:30:00	2014-07-12 15:15:00	4019193	1	81	0.53	C56	Malignant neoplasm of ovary	K631	K631: Perforation of intestine (nontraumatic)	GSU	Sunshine General Surgery Unit
1187	Small Bowel	Perforation - trauma	Candida tropicalis		Candida glabrata				2014-06-28 11:30:00	2014-07-06 13:00:00	4014063	1	41	8.06	S3649	Injury oth & multiple parts sm intestine	K353	K353: Ac appendicitis w localised peritonitis	GBES	Breast Endocrine & Gen Surg
1197	Gallbladder	Cholecystitis	no growth						2014-06-19 02:55:00	2014-06-23 11:12:00	4009675	1	55	4.35	K8000	Calculus gallb w ac cholecystitis wo obs	K822	K822: Perforation of gallbladder	GSU	Sunshine General Surgery Unit
1210	Appendix	Re-collection	E.coli	Ceftriaxone					2014-06-08 14:50:00	2014-06-16 10:09:00	4005556	1	39	7.8	K353	Ac appendicitis w localised peritonitis	K353	K353: Ac appendicitis w localised peritonitis	GBES	Breast Endocrine & Gen Surg
1220	Sigmoid Colon	Perforation - CRC	No growth						2014-05-30 17:40:00	2014-06-10 18:15:00	4002306	1	55	11.02	C187	Malignant neoplasm of sigmoid colon	K631	K631: Perforation of intestine (nontraumatic)	GBES	Breast Endocrine & Gen Surg
1224	Distal colon	Postop collection	Pseudomonas aeruginosa	Ciprofloxacin (R to Ceft)					2014-05-25 00:55:00	2014-06-05 17:01:00	3991355	1	37	11.67	C20	Malignant neoplasm of rectum	K631	K631: Perforation of intestine (nontraumatic)	CRGS	Colorectal & Gen Surgery Unit
1233	Appendix	Appendicitis	No growth						2014-05-11 20:15:00	2014-05-15 09:50:00	3966466	1	23	3.57	K353	Ac appendicitis w localised peritonitis	K353	K353: Ac appendicitis w localised peritonitis	UGIG	Upper Gi & Gen Surgical Unit
1234	Biliary	Whipple's	Streptococcus anginosus	Penicillin					2014-05-09 07:17:00	2014-06-04 12:46:00	3963044	1	73	26.23	C240	Malignant neoplm extrahepatic bile duct	K918	K918: Oth postproc disrd digestive system NEC	UGIG	Upper Gi & Gen Surgical Unit
1243	Distal colon	Postop collection	Streptococcus anginosus	Penicillin					2014-04-30 07:00:00	2014-05-20 12:29:00	3945843	1	45	20.23	C787	Sec malg neoplm lvr & intrahep bile dct	K918	K918: Oth postproc disrd digestive system NEC	UGIG	Upper Gi & Gen Surgical Unit
1244a	Sigmoid Colon	Diverticulitis	Pseudomonas aeruginosa	Ciprofloxacin (R to Ceft)	Enterococcus faecalis	Amox/Vanc (R to Ceft)	VRE	Teicoplanin	2014-04-25 14:41:00	2014-05-02 00:50:00	3939231	1	62	6.42	K353	Ac appendicitis w localised peritonitis	K353	K353: Ac appendicitis w localised peritonitis	GSU	Sunshine General Surgery Unit
1244b	Sigmoid Colon	Re-collection	Pseudomonas aeruginosa	Ciprofloxacin (R to Ceft)
1247	Small Bowel	Perforation - gallstone ileus	Mixed anaerobes		Mixed coliforms				2014-04-21 00:01:00	2014-04-29 11:55:00	3931633	1	84	8.5	A419	Sepsis, unspecified	K631	K631: Perforation of intestine (nontraumatic)	UGIG	Upper Gi & Gen Surgical Unit
1249a	Sigmoid Colon	Diverticulitis	Pseudomonas aeruginosa	Ciprofloxacin (R to Ceft)	Mixed coliforms				2014-04-17 02:00:00	2014-06-04 15:11:00	3927233	1	71	48.55	K5722	Diverlitis lrg intest w perf abs wo haem	K5722	K5722: Diverlitis lrg intest w perf abs wo haem	CRGS	Colorectal & Gen Surgery Unit
1249b	Sigmoid Colon	Re-collection	Pseudomonas aeruginosa	Ciprofloxacin (R to Ceft)	Enterococcus faecalis	Amox/Vanc (R to Ceft)
1249c	Sigmoid Colon	Re-collection	VRE	Teicoplanin
1275	Distal colon	Postop collection	VRE	Teicoplanin	Mixed coliforms				2014-03-31 07:38:00	2014-03-31 11:55:00	3896791	1	47	0.18	K918	Oth postproc disrd digestive system NEC	K918	K918: Oth postproc disrd digestive system NEC	GSU	Sunshine General Surgery Unit
1297	Appendix	Appendicitis	Klebsiella pneumoniae	Ceftriaxone					2014-03-07 08:19:00	2014-03-14 11:05:00	3875089	1	57	7.12	K353	Ac appendicitis w localised peritonitis	K353	K353: Ac appendicitis w localised peritonitis	GBES	Breast Endocrine & Gen Surg
1308	Appendix	Appendicitis	Mixed enteric flora						2014-02-24 15:05:00	2014-03-12 11:14:00	3863346	1	39	15.84	K353	Ac appendicitis w localised peritonitis	K353	K353: Ac appendicitis w localised peritonitis	UGIG	Upper Gi & Gen Surgical Unit
1312a	Caecum	Perforation - obstruction	Klebsiella oxytoca	Ceftriaxone	VRE	Teicoplanin	Candida albicans		2014-02-22 19:17:00	2014-08-15 12:00:00	3861721	2	77	173.7	K918	Oth postproc disrd digestive system NEC	K631	K631: Perforation of intestine (nontraumatic)	CRGS	Colorectal & Gen Surgery Unit
1312b	Caecum	Re-collection	Klebsiella oxytoca	Ceftriaxone	E.coli	Ceftriaxone	VRE	Teicoplanin
1312c	Caecum	Re-collection	Klebsiella oxytoca	Ceftriaxone	E.coli	Ceftriaxone	VRE	Teicoplanin
1328	Appendix	Appendicitis	No growth						2014-02-10 10:29:00	2014-02-21 17:45:00	3843755	1	83	11.3	K353	Ac appendicitis w localised peritonitis	K353	K353: Ac appendicitis w localised peritonitis	GBES	Breast Endocrine & Gen Surg
1331	Sigmoid Colon	Diverticulitis	E.coli	Ceftriaxone	Skin flora				2014-02-04 22:15:00	2014-02-13 15:52:00	3838435	1	53	8.73	K5722	Diverlitis lrg intest w perf abs wo haem	K5722	K5722: Diverlitis lrg intest w perf abs wo haem	CRGS	Colorectal & Gen Surgery Unit
1333	Appendix	Appendicitis	E.coli	Ceftriaxone	Streptococcus constellatus	Penicillin			2014-02-03 20:00:00	2014-02-10 21:00:00	3837523	1	44	7.04	K353	Ac appendicitis w localised peritonitis	K353	K353: Ac appendicitis w localised peritonitis	GSU	Sunshine General Surgery Unit
1344	Gallbladder	Cholecystitis	No growth						2014-01-16 15:45:00	2014-02-04 20:37:00	3822308	1	82	19.2	K810	Acute cholecystitis	K822	K822: Perforation of gallbladder	UGIG	Upper Gi & Gen Surgical Unit
1361a	Terminal ileum	Perforation - Crohn's	E.coli (ESBL)	Meropenem, cipro, cotrimox					2013-11-10 16:05:00	2014-01-14 11:23:00	3780524	1	21	64.8	K508	Other Crohn's disease	K631	K631: Perforation of intestine (nontraumatic)	CRGS	Colorectal & Gen Surgery Unit
1361b	Terminal ileum	Re-collection	No growth
1361c	Terminal ileum	Re-collection	No growth
